# Supplementary material
Source: publisher figshare collection journal article supplement (https://acs.figshare.com/ndownloader/files/4028146)
Supplement: Supplementary file 1 [file 4028146]

## *Supporting Information*

# Photo-Induced Ligation of Acrylonitrile-Butadiene Rubber: Selective Tetrazole-Ene Coupling of Chain-End Functionalized Copolymers of 1,3-Butadiene

*Christoph J. Dürr,<sup>1</sup> Paul Lederhose,<sup>1</sup> Lebohang Hlalele,<sup>1</sup> Doris Abt,<sup>1</sup> Andreas Kaiser,<sup>2</sup>*

*Sven Brandau<sup>2</sup> and Christopher Barner-Kowollik<sup>\*1</sup>*

<sup>1</sup>Preparative Macromolecular Chemistry, Institut für Technische Chemie und Polymerchemie, Karlsruhe Institute of Technology (KIT), Engesserstr. 18, 76128 Karlsruhe and Institut für Biologische Grenzflächen, Karlsruhe Institute of Technology (KIT), Hermann-von-Helmholtz Platz1, 76344 Eggenstein-Leopoldshafen, Germany.

<sup>2</sup>Lanxess Emulsion Rubber, BP 7 – Z.I. Rue du Ried, 67610 La Wantzenau, France.

## Experimental Procedures

### Synthesis of ethyl 2-(((dodecylthio)carbonothioyl)thio)propanoate (**8**)

DoPAT (2.000 g, 5.7 mmol), DMAP (0.014 g, 0.1 mmol) and ethanol (0.616 g, 13.4 mmol) were dissolved in 10 mL THF. After the solution was cooled to 0 °C, DCC (1.290 g, 6.3 mmol) was added. The reaction mixture was stirred at ambient temperature for 16 h. THF was removed in vacuum. The obtained solid was dissolved in Et<sub>2</sub>O, extracted with 1 M hydrochloric acid (4×100 mL) and washed with saturated NaHCO<sub>3</sub> solution (100 mL). The organic layer was dried over MgSO<sub>4</sub> and Et<sub>2</sub>O was removed under reduced pressure. The crude product was purified via column chromatography on silica gel using hexane/ethyl acetate (3:1, v/v, *R<sub>f</sub>* 0.61) as the eluent. After drying under high vacuum compound **10** was obtained as yellow oil (1.430 g, 66%). <sup>1</sup>H and <sup>13</sup>C NMR characterization are provided in Fig. S19 and Fig. S20, respectively.

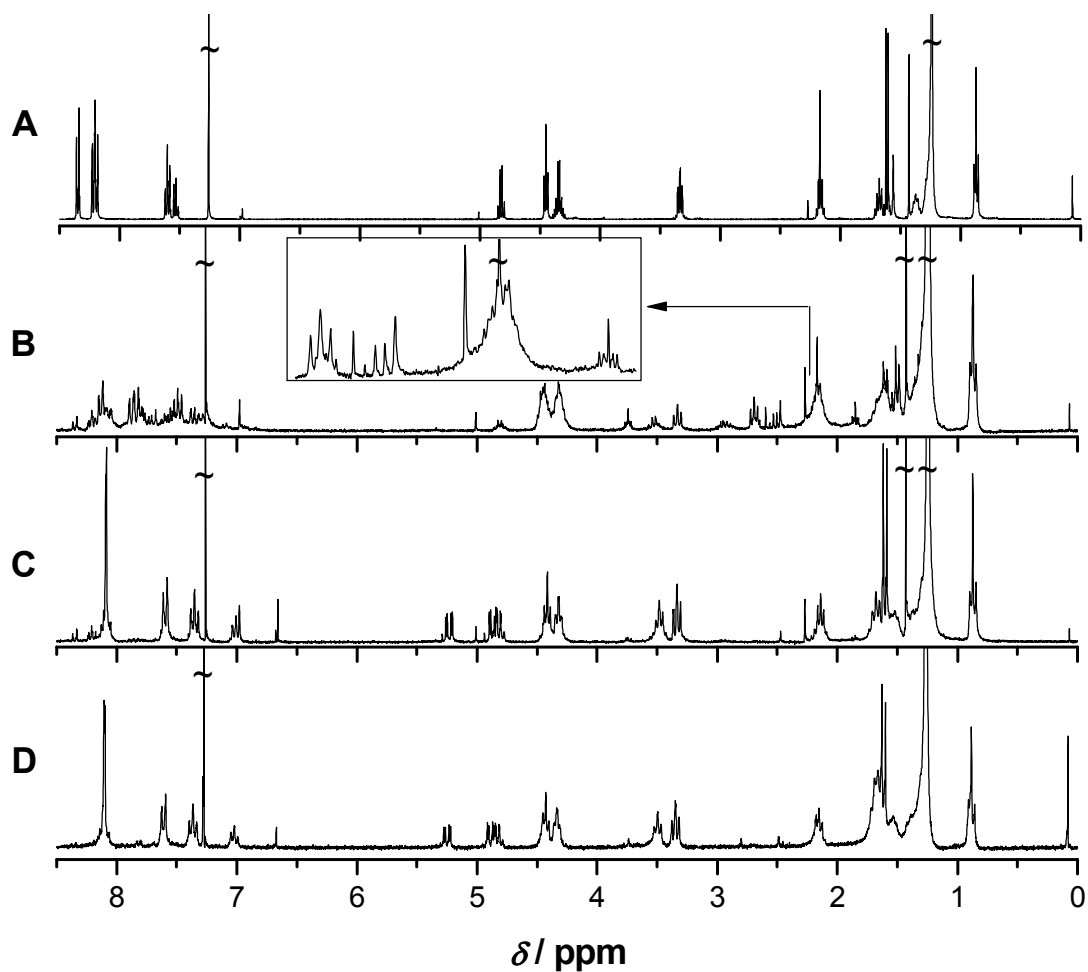

**Figure S1.** <sup>1</sup>H NMR spectra (CDCl<sub>3</sub>) of A) the diaryl tetrazole-functional RAFT agent **3** and B-D) the reaction mixtures obtained after irradiation with UV light of 254 nm at ambient temperature in acetonitrile in the presence of olefins: B) reactants: **3**, *trans*-3-octene (ratio 1:1), 3 h; C) reactants: **3**, *trans*-3-octene, linker **5** (1:1:0.5), 3 h; D) reactants: **3**, linker **5**, (ratio 1:1) 15 min. Acetonitrile was removed under reduced pressure prior to analysis.

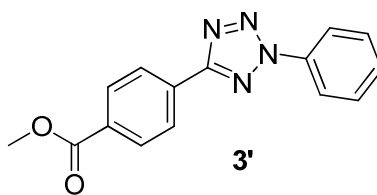

**Figure S2.** Chemical structure of the diaryl tetrazole precursor **3'** of the nitrile imine intermediate employed in the DFT calculation of the HOMO energy level of the 1,3-dipole for the discussion of the selectivity of the cycloadditions towards various olefins.

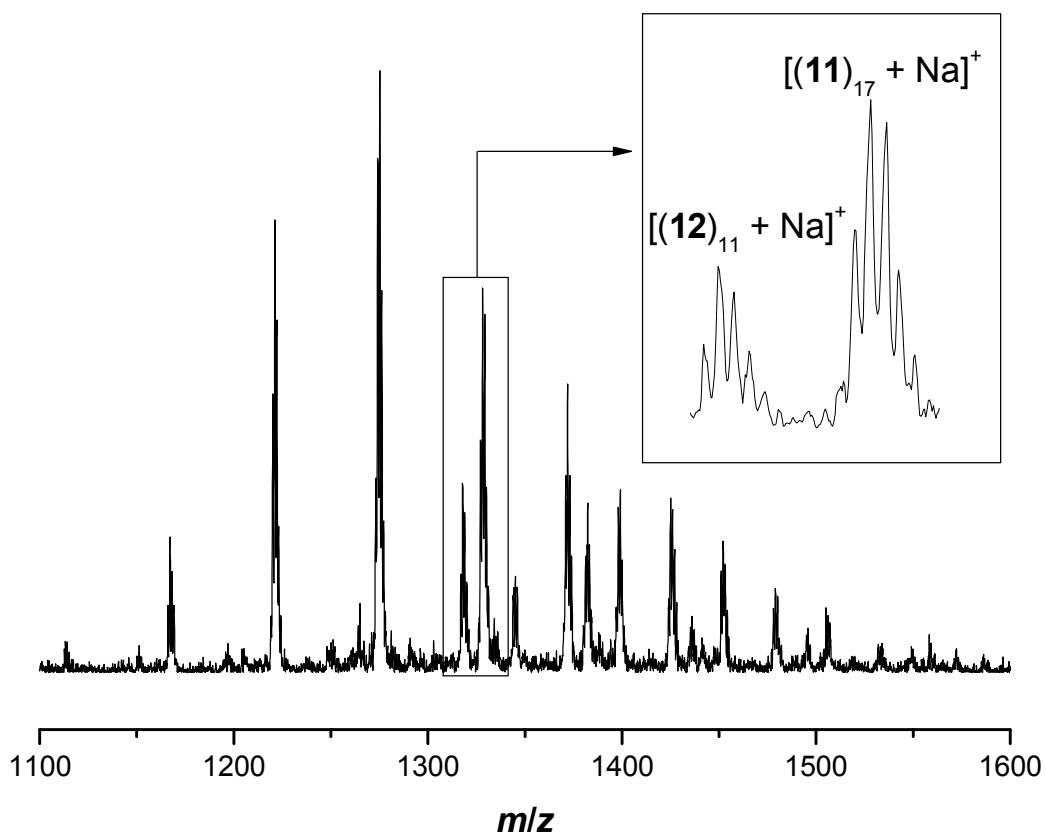

**Figure S3.** Magnified view into the region of 1100-1600 Da of the SEC-ESI mass spectrum of a polymer sample obtained after irradiation of a plain solution of tetrazole-functional NBR **4a** in acetonitrile with UV light of 254 nm for 3 h. For simplification of the SEC-ESI-MS analysis, the UV labile trithiocarbonate chain-end was removed with 1,1'-azobis(cyclohexane-1-carbonitrile) (0.34 mmol per gram of **4a**) in the presence of 1-ethylpiperidine hypophosphite (7.2 mmol per gram of **4a**) in toluene (35 mL per gram of **4a**) at 100 °C for 8 h prior to the irradiation, in analogy to a procedure described previously.<sup>5</sup> For signal assignments of structures **11** and **12** refer to Fig. S4.

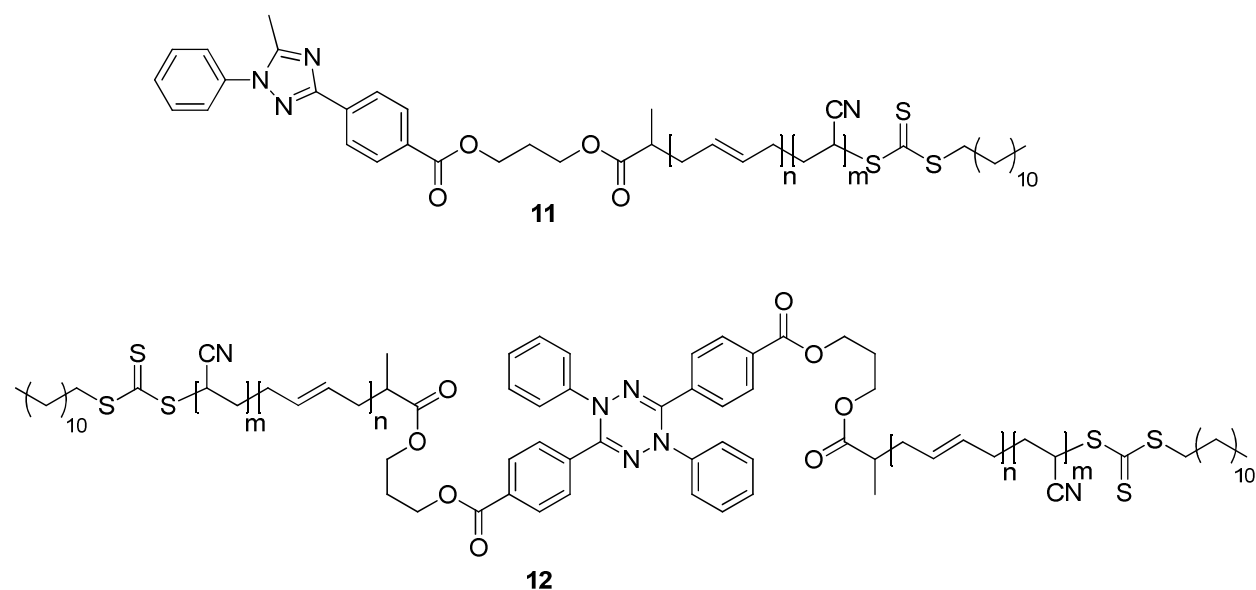

**Figure S4.** Structures of the side products formed during irradiation of a plain solution of tetrazole-functional NBR **4a** with UV light of 254 nm for 3 h in acetonitrile. The side products were observed in ESI-MS after removal of the UV labile trithiocarbonate prior to irradiation. For simplification, the side products are depicted with the trithiocarbonate chain-end structures. The cycloadduct **11** is formed via the reaction of the nitrile moiety of acetonitrile with the nitrile imine of the NBR formed via UV irradiation. The cycloadduct **12** is formed via the reaction of the nitrile imine moieties (formed *in-situ* from the tetrazole-functional NBRs) of two polymer chains.

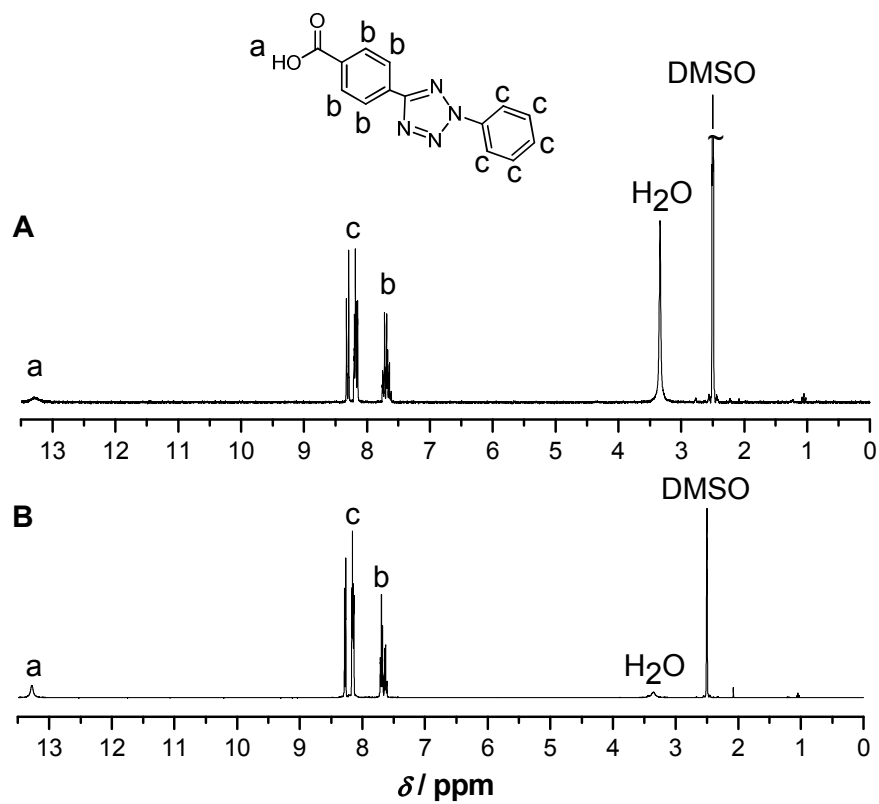

**Figure S5.** Investigation of the temperature stability of tetrazole **1**:  $^1\text{H}$  NMR spectra in  $\text{DMSO-d}_6$  A) before and B) after heating **1** to 100 °C for a period of 8 h.

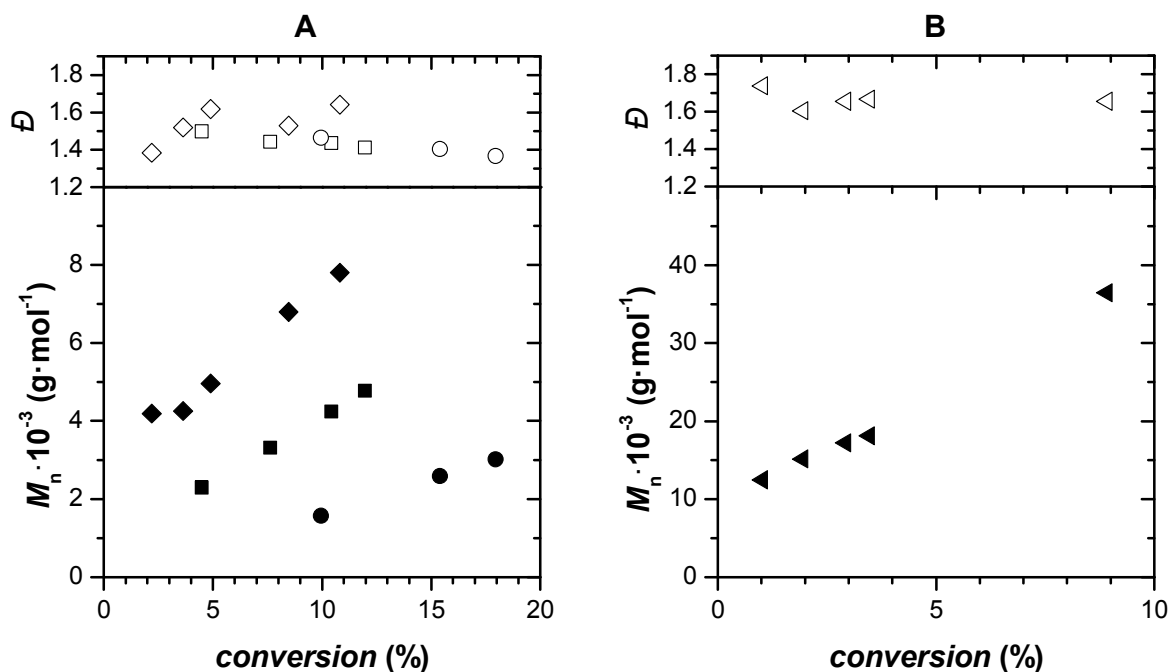

**Figure S6.** Evolution of molar mass and dispersity with conversion for a selection of RAFT mediated copolymerizations of AN and BD in their azeotropic ratio of 38/62 ( $[M]_0$  9.5 M). Polymerizations were performed in chlorobenzene at 100 °C, employing the tetrazole-functional controlling agent **3** and 1,1'-azobis(cyclohexane-1-carbonitrile) as the initiator. Conditions: A) rhombs:  $[3]_0$  3.5 mM,  $[Ini]_0$  0.3 mM (Table 2, entry 5), boxes:  $[3]_0$  8.4 mM,  $[Ini]_0$  1.0 mM (Table 2, entry 4), circles:  $[3]_0$  21.0 mM,  $[Ini]_0$  2.6 mM (Table 2, entry 3); B) triangles:  $[3]_0$  0.8 mM,  $[Ini]_0$  0.2 mM (Table 2, entry 6).



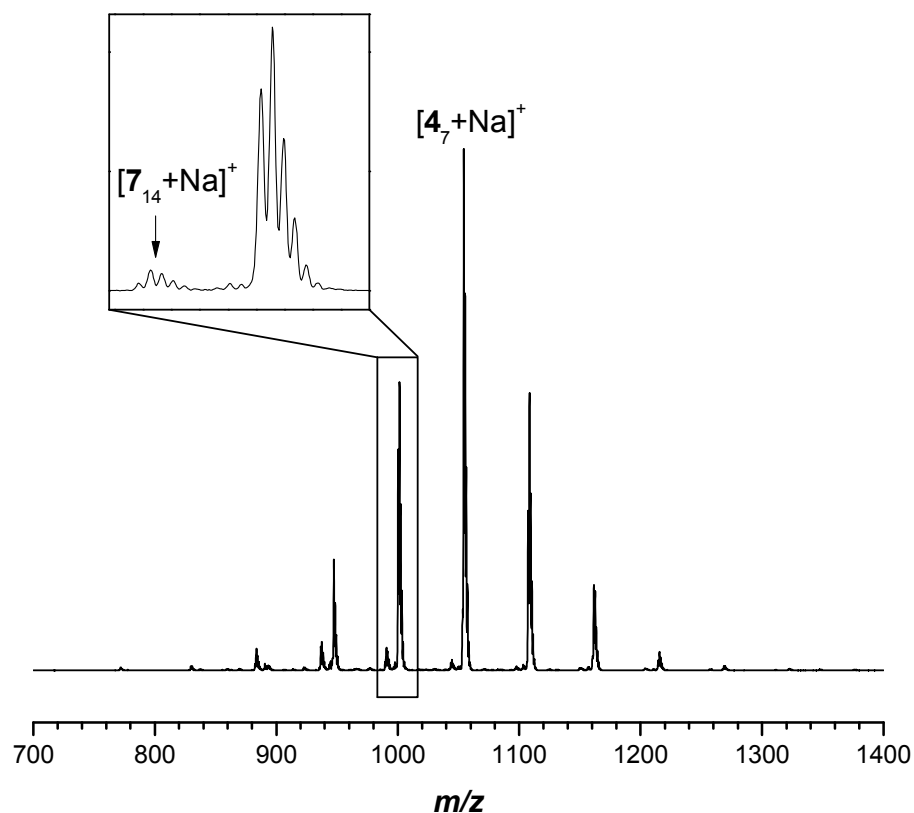

**Figure S7.** Magnified view into the region of 700 to 1400 Da of a SEC-ESI mass spectrum of the tetrazole-functionalized NBR **4a**. Polymer **7** is formed by recombination of two growing copolymer chains that were both initiated by the azo initiator fragment and is an inevitable side product of the RAFT process.

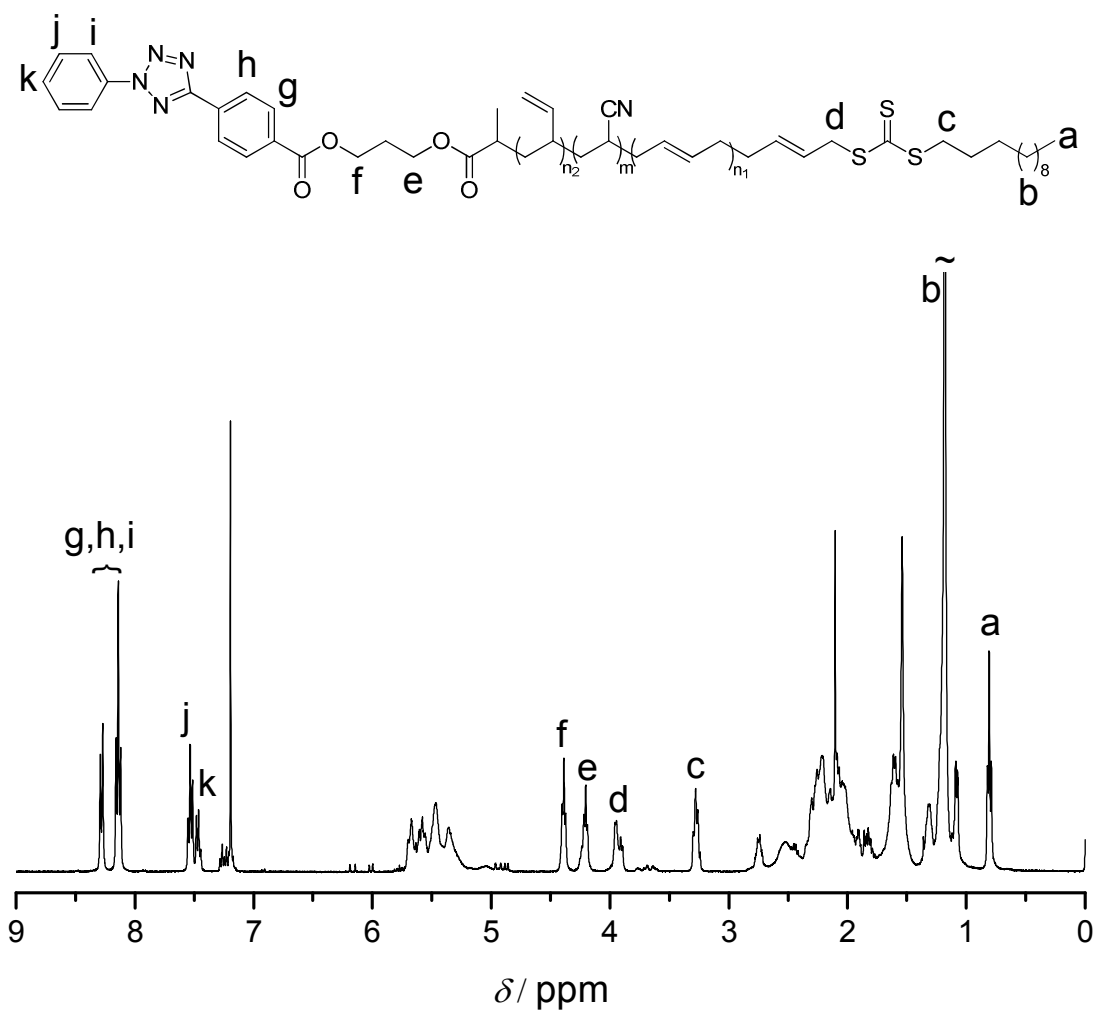

**Figure S8.**  $^1\text{H}$  NMR characterization of the chain-end proton resonances of the tetrazole-functionalized NBR **4a**.

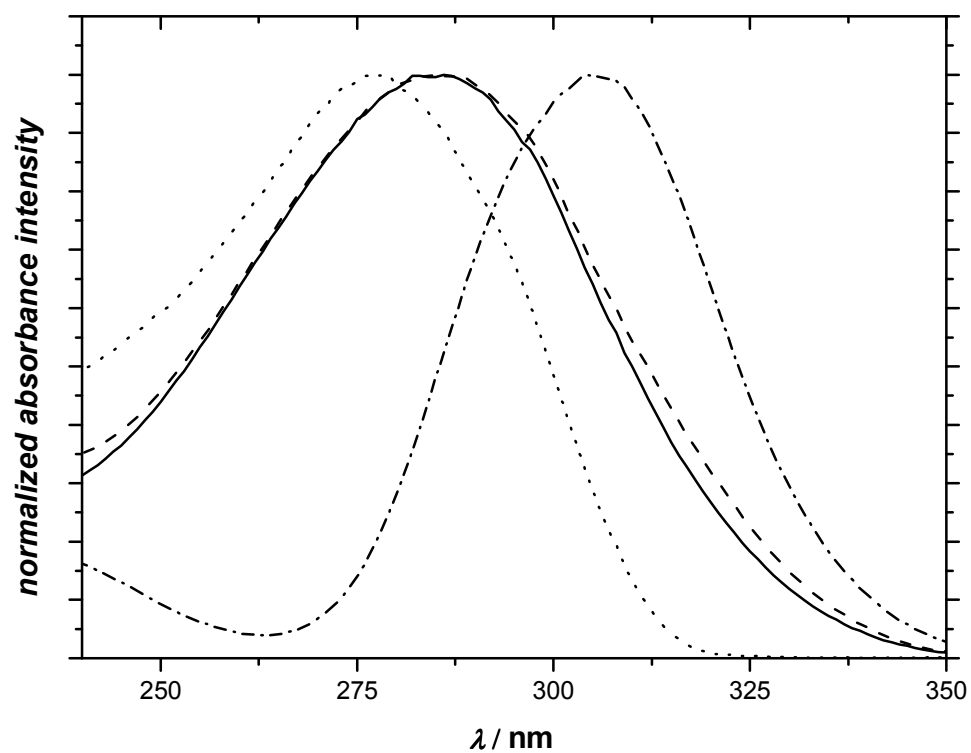

**Figure S9.** UV absorption spectra of tetrazole-functional controlling agent **3** (solid line), tetrazole-functional RAFT NBR **4a** (dashed line), trithiocarbonate **8** (dash-dotted line) and tetrazole **9** (dotted line).

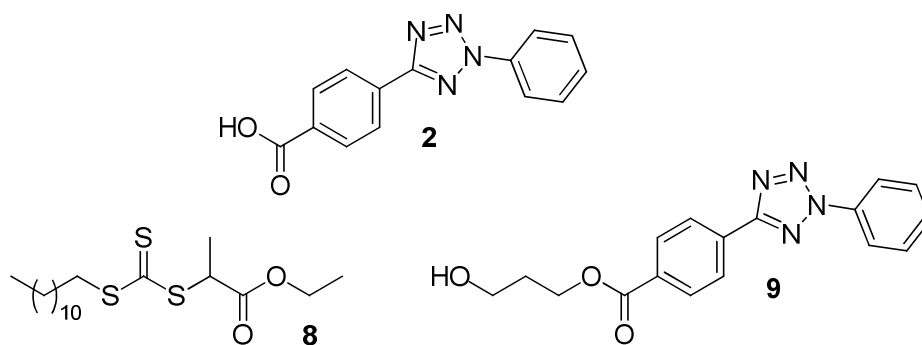

**Figure S10.** Chemical structures of compounds discussed in the manuscript.

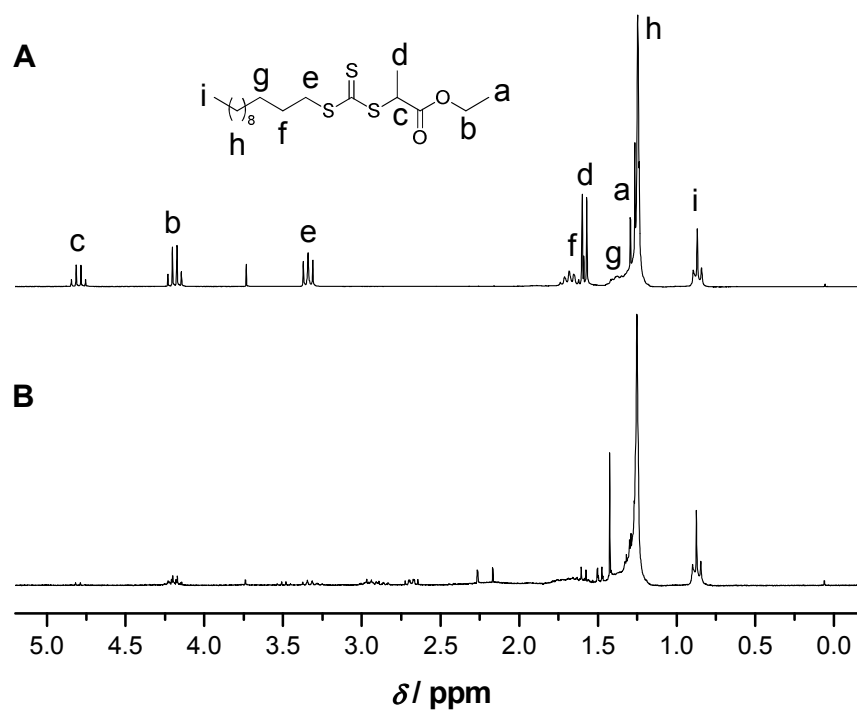

**Figure S11.**  $^1\text{H}$  NMR spectra ( $\text{CDCl}_3$ ) of alkyl-functional RAFT agent **8** A) before and B) after irradiation with UV light of 254 nm for 3 h, evidencing the decomposition of the trithiocarbonate under UV irradiation.

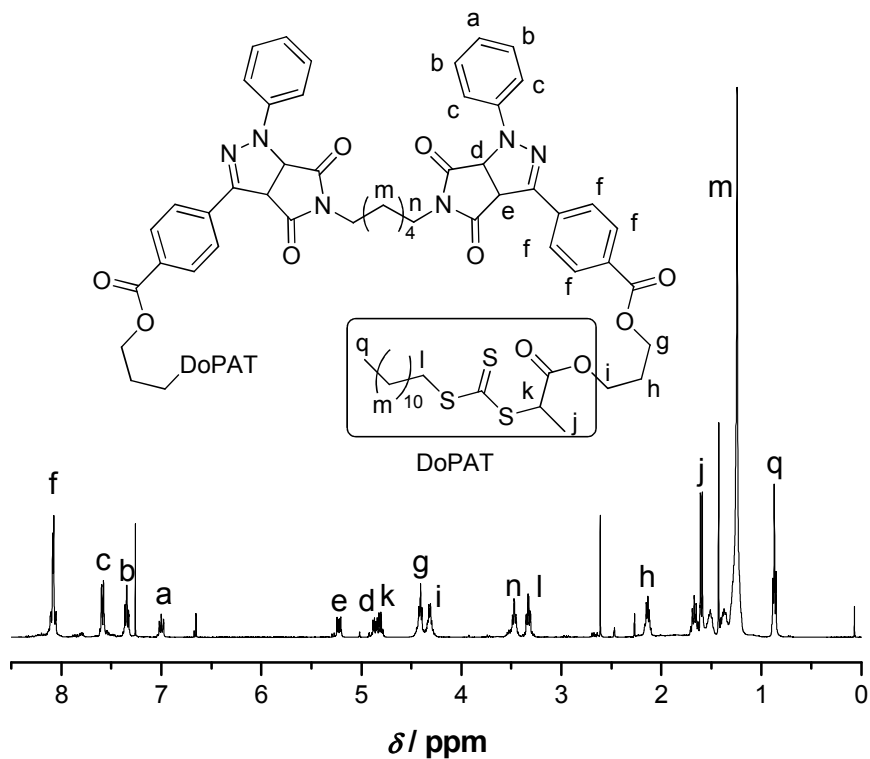

**Figure S12.**  $^1\text{H}$  NMR characterization (ambient temperature,  $\text{CDCl}_3$ ) of compound **10** obtained in the NITEC reaction of tetrazole-functional controlling agent **3** with 0.5 equivalents of bis(maleimido)hexane **5** upon irradiation with UV light of 254 nm for 15 min.

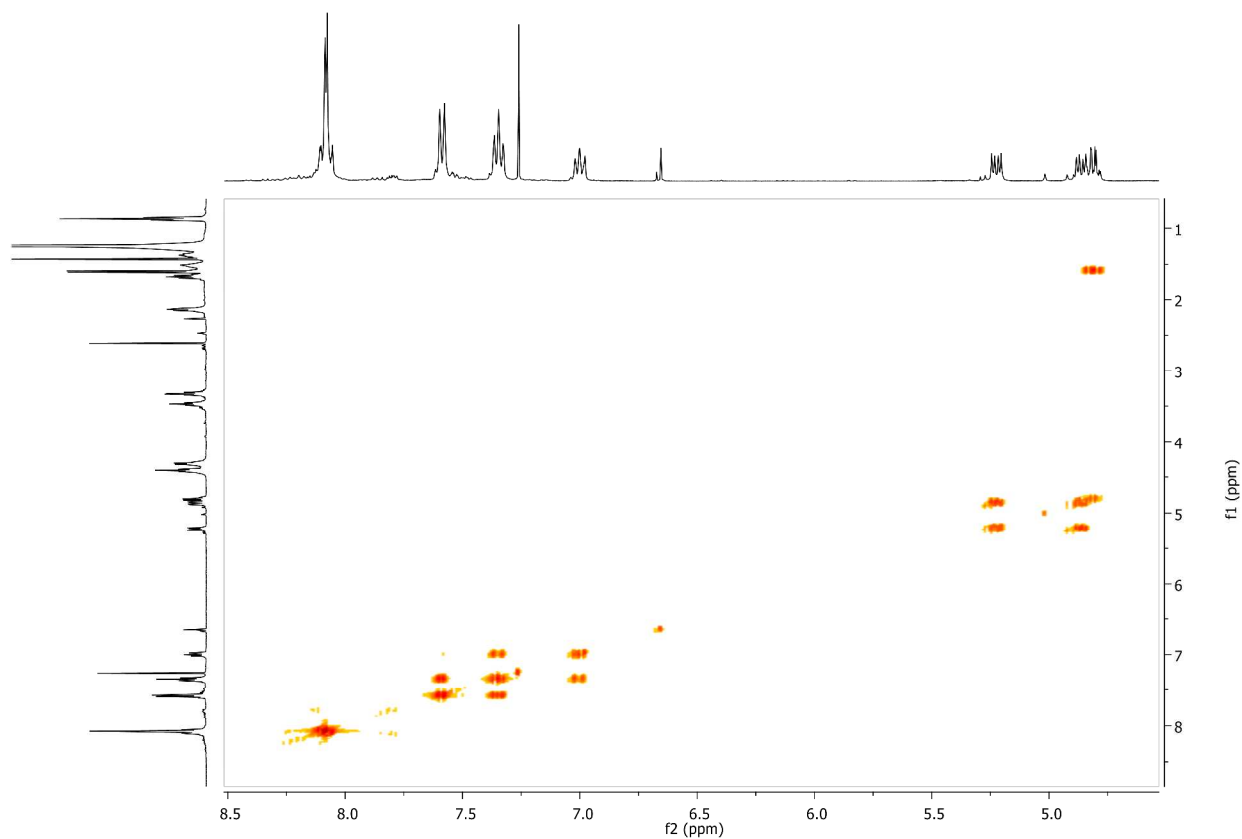

**Figure S13.**  $^1\text{H}$ - $^1\text{H}$  COSY NMR spectrum (ambient temperature,  $\text{CDCl}_3$ ) of compound **10** obtained in the NITEC reaction of tetrazole-functional controlling agent **3** with 0.5 equivalents of **5** after irradiation with UV light of 254 nm for 15 min. The provided zoom allows signal assignments of the aromatic protons (a, b, c and f, see Fig. S12) and the methine protons (d, e and k, see Fig. S12).

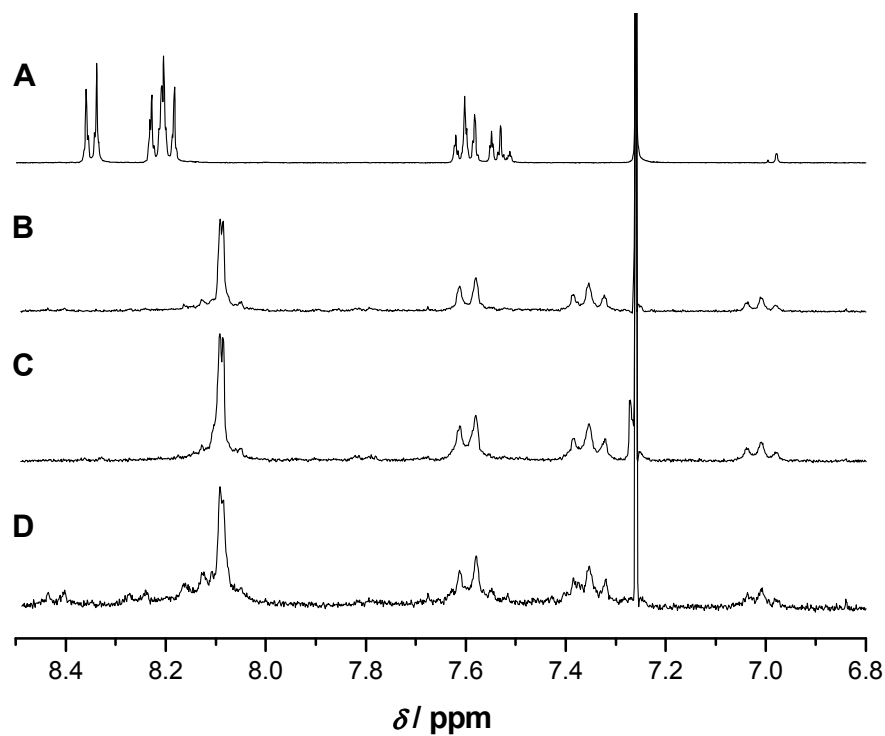

**Figure S14.** Magnified view into the region of 8.5-6.8 ppm of the <sup>1</sup>H NMR spectra following the NITEC reaction of tetrazole-functional RAFT agent **3** with 0.5 equivalents of linker **5**: A) before and B) after 15 min, C) after 60 min and D) after 180 min of irradiation with UV light of 254 nm.

**Table S1.** Experimental details for the light-induced coupling of NBR building blocks **4** in the presence of 0.5 equivalents of **5**.<sup>a</sup>

| entry | coupling of | m( <b>4</b> )<br>(mg) | $V_{\text{total}}$<br>(ml) <sup>b</sup> |
|-------|-------------|-----------------------|-----------------------------------------|
| 1     | <b>4b</b>   | 40                    | 6                                       |
| 2     | <b>4e</b>   | 40                    | 6                                       |
| 3     | <b>4f</b>   | 120                   | 6                                       |

<sup>a</sup> Conditions: Irradiation with UV-light of 254 nm for 3 h in acetonitrile. <sup>b</sup>  $V_{\text{total}}$  is the total reaction volume of the coupling experiments.

**Table S2.** SEC data of the light-induced coupling of NBR building blocks **4** in the presence of 0.5 equivalents of **5**.<sup>a</sup>

| entry | tetrazole-functional NBR <b>4</b> |                                           |             | coupling product <b>6</b> |                                           |             |
|-------|-----------------------------------|-------------------------------------------|-------------|---------------------------|-------------------------------------------|-------------|
|       |                                   | $M_n$ (g·mol <sup>-1</sup> ) <sup>b</sup> | $\bar{D}^b$ |                           | $M_n$ (g·mol <sup>-1</sup> ) <sup>b</sup> | $\bar{D}^b$ |
| 1     | <b>4b</b>                         | 1800                                      | 1.2         | <b>6b</b>                 | 3200                                      | 1.3         |
| 2     | <b>4e</b>                         | 9400                                      | 1.5         | <b>6e</b>                 | 17 000                                    | 1.5         |
| 3     | <b>4f</b>                         | 38 000                                    | 1.6         | <b>6g</b>                 | 48 000                                    | 1.7         |

<sup>a</sup> Conditions: Irradiation with UV-light of 254 nm for 3 h in acetonitrile. <sup>b</sup> Obtained from SEC via universal calibration employing the MHKS parameters of NBR.<sup>3</sup>



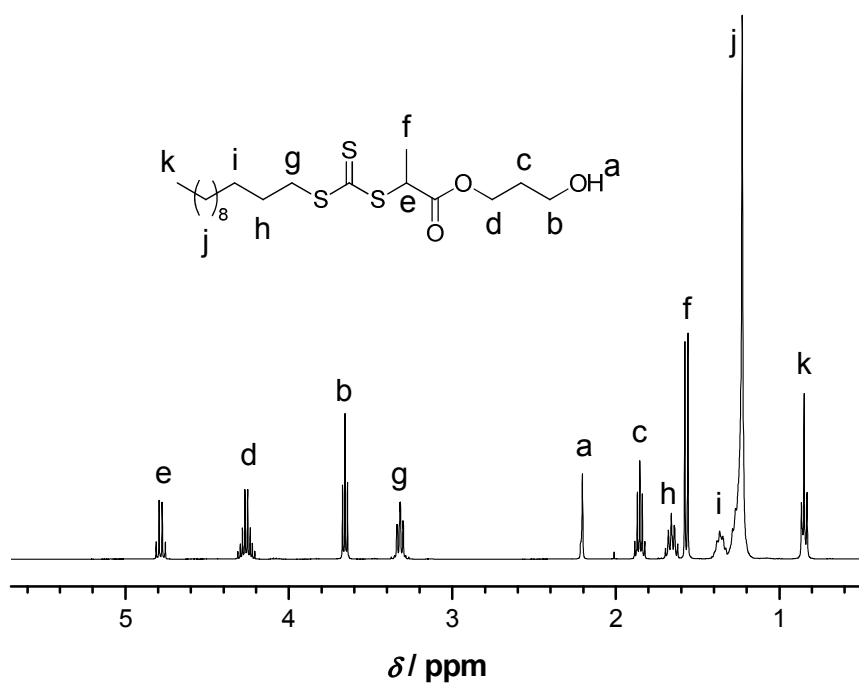

**Figure S15.**  $^1\text{H}$  NMR characterization of trithiocarbonate **2** in  $\text{CDCl}_3$ .

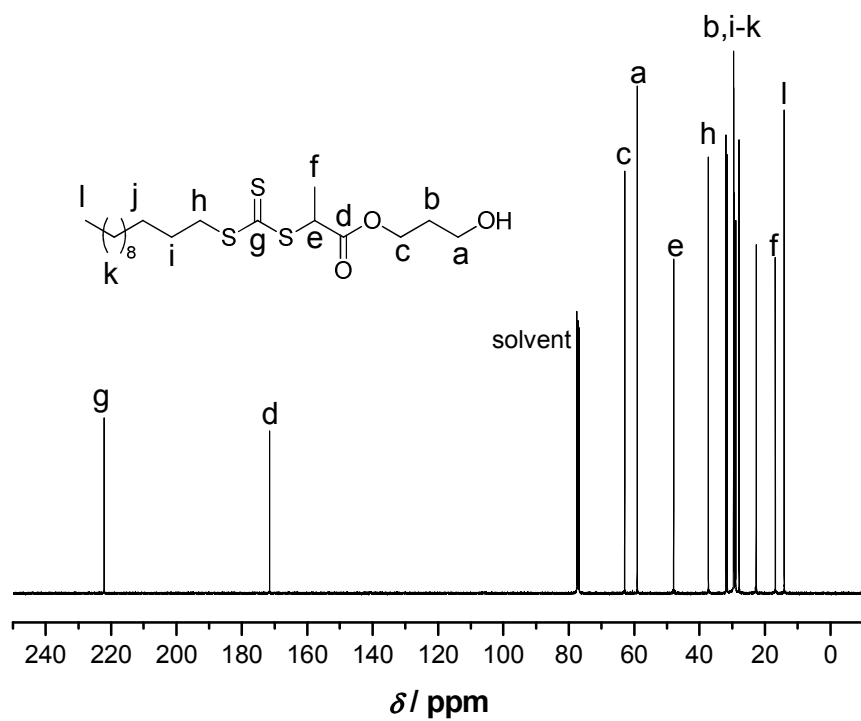

**Figure S16.**  $^{13}\text{C}$  NMR characterization of trithiocarbonate **2** in  $\text{CDCl}_3$ .

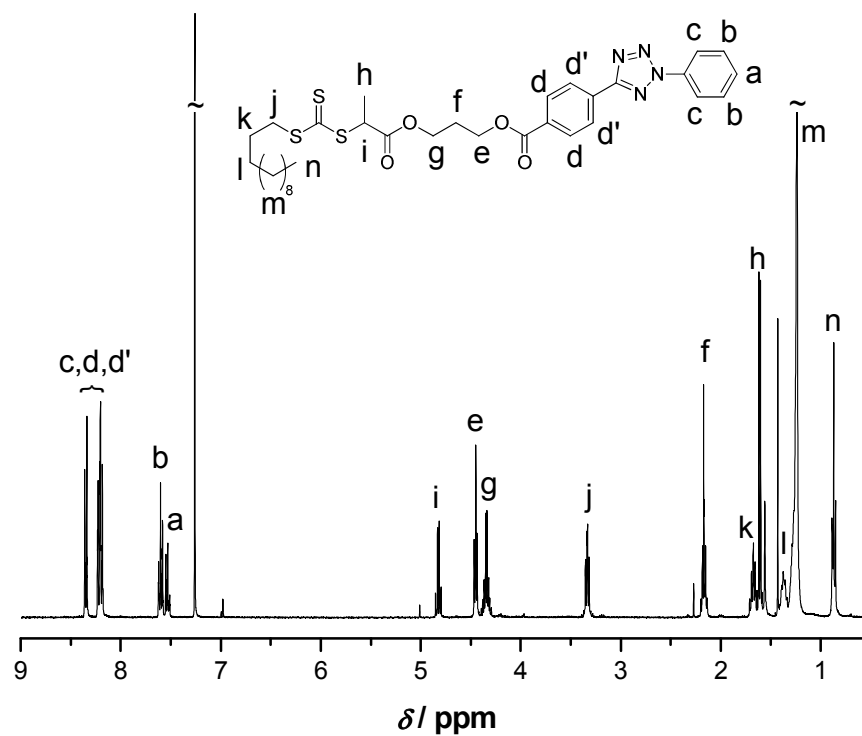

**Figure S17.**  $^1\text{H}$  NMR characterization of diaryl tetrazole-functional controlling agent **3** in  $\text{CDCl}_3$  obtained via esterification of hydroxyl-functional RAFT agent **2** and diaryl tetrazole **1**.

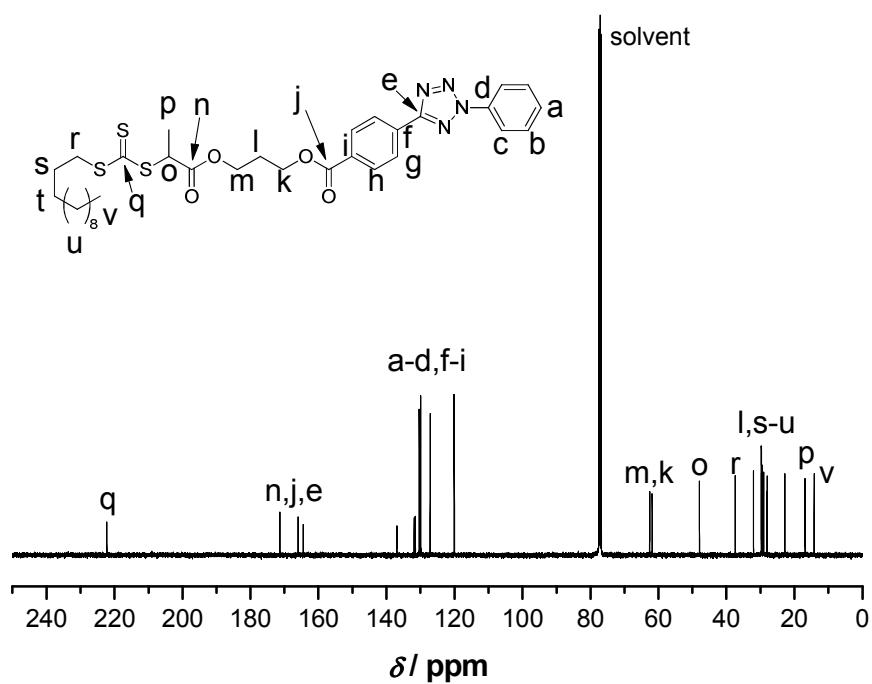

**Figure S18.**  $^{13}\text{C}$  NMR characterization of diaryl tetrazole-functional controlling agent **3** in  $\text{CDCl}_3$  obtained via esterification of hydroxyl-functional RAFT agent **2** and diaryl tetrazole **1**.

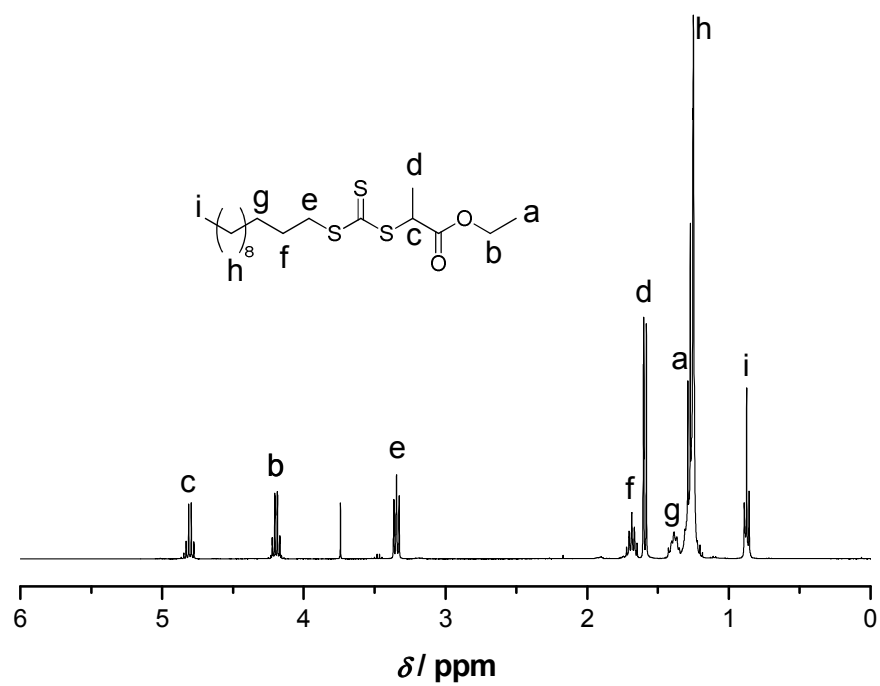

**Figure S19.** Ambient temperature  $^1\text{H}$  NMR characterization of controlling agent **8** in  $\text{CDCl}_3$  obtained via esterification of DoPAT with ethanol.

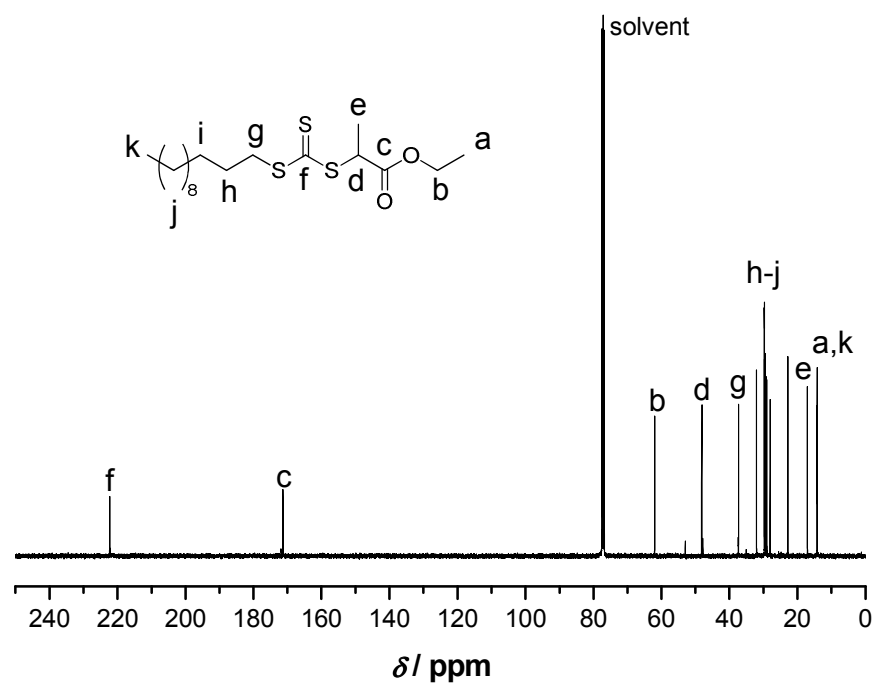

**Figure S20.** Ambient temperature  $^{13}\text{C}$  NMR characterization of controlling agent **8** in  $\text{CDCl}_3$  obtained via esterification of DoPAT with ethanol.

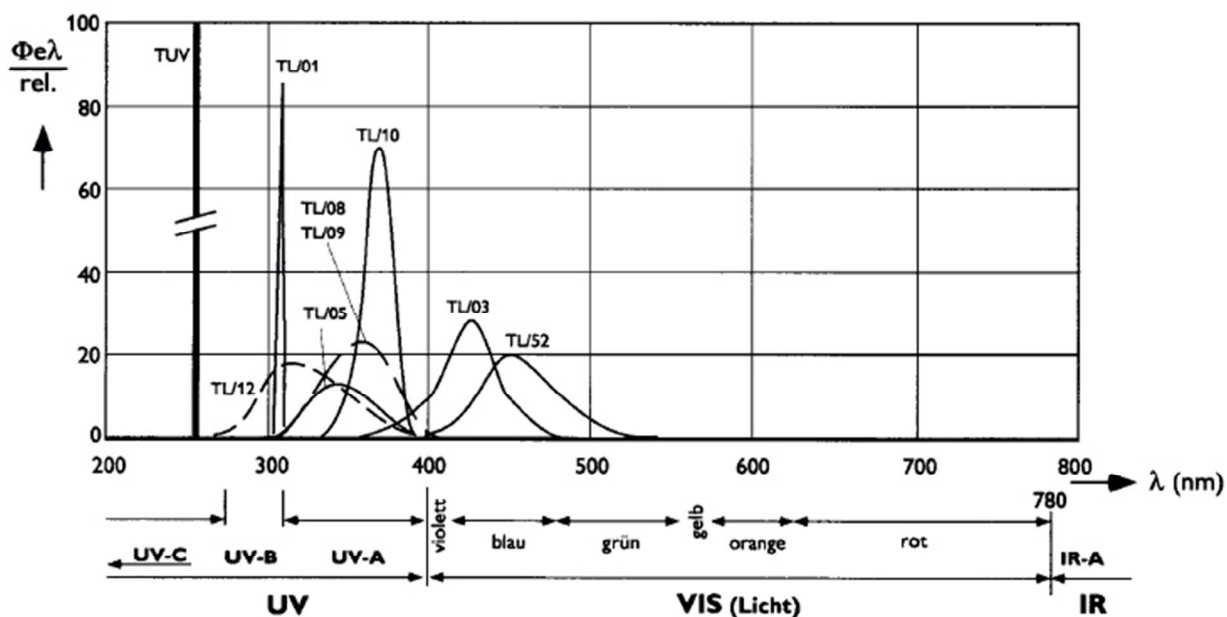

**Figure S21.** Emission spectrum of the UV lamp (TUV) as provided by Philips Lighting Professional.

## References

1. Song, W.; Wang, Y.; Qu, J.; Madden, M. M.; Lin, Q., *Angew. Chem. Int. Ed.* **2008**, 47 (15), 2832-2835.
2. Kaiser, A.; Brandau, S.; Klimpel, M.; Barner-Kowollik, C., *Macromol. Rapid Commun.* **2010**, 31 (18), 1616-1621.
3. Dürr, C. J.; Hlalele, L.; Schneider-Baumann, M.; Kaiser, A.; Brandau, S.; Barner-Kowollik, C., *Polym. Chem.* **2013**, DOI: 10.1039/C3PY00580A.
4. Dietrich, M.; Glassner, M.; Gruendling, T.; Schmid, C.; Falkenhagen, J.; Barner-Kowollik, C., *Polym. Chem.* **2010**, 1 (5), 634-644.
5. Vogt, A. P.; Sumerlin, B. S., *Macromolecules* **2008**, 41 (20), 7368-7373.
